## **Tissue expression in surgically retrieved cam deformity and capsule from patient hips with Cam-type Femoroacetabular Impingement Syndrome**

Catherine Yuh<sup>1</sup>, Philip Malloy<sup>1,2</sup>, Steven P Mell<sup>1</sup>, Zeeshan Khan<sup>1</sup>, Shane J. Nho<sup>1</sup>, Robin Pourzal<sup>1</sup>, Jorge Chahla<sup>1</sup>, Deborah J Hall<sup>1</sup>

### **Affiliations:**

<sup>1</sup>Rush University Medical Center  
Department of Orthopaedic Surgery  
1611 W Harrison St. Suite 204E  
Chicago, IL 60612

<sup>2</sup>Arcadia University  
Department of Physical Therapy  
Glenside, PA 19038

### **Corresponding Author:**

Catherine Yuh  
1611 W Harrison St.  
Suite 204E  
Chicago, IL 60612  
847-951-3943  
[catherine\\_yuh@rush.edu](mailto:catherine_yuh@rush.edu)

### **Acknowledgements:**

The authors would like to thank Dr. Cecilia Pascual-Garrido for guidance on method development and data interpretation.

### **Declaration of Conflicting Interests:**

The authors declare that there is no conflict of interest.

### **Funding Statement:**

The authors disclosed receipt of the following financial support for the research, authorship, and/or publication of this article: This work was supported by a NIAMS-funded postdoctoral fellowship awarded to the first author (Yuh, NIH T32AR073157).

### **Ethics Approval Statements:**

This study received ethical approval through a Notification of Exemption from IRB Review, from the Rush University IRB, on 7/29/2021.

## **Tissue expression in surgically retrieved cam deformity and capsule from patient hips with Cam-type Femoroacetabular Impingement Syndrome**

### **ABSTRACT**

**Introduction:** Cam-type femoroacetabular impingement syndrome (FAIS) is a pre-arthritis hip condition, defined as a bony growth on the proximal femur that causes abnormal joint contact. The tissue presentation of the cam deformity and capsule in FAIS remains understudied. The purpose of this study was to 1) evaluate histopathological features in cam deformity and capsule from FAIS patients, 2) assess the extent of local inflammation within the capsule, and 3) determine relationships between cam deformity tissue composition versus  $\alpha$  angle and patient factors.

**Methods:** Cam deformity and capsular tissues were collected from FAIS patients undergoing arthroscopic surgery. Samples were histologically processed, imaged using light and polarized light microscopy, and assessed with point counting. Correlation-based statistics were performed to identify features correlated with  $\alpha$  angle and patient factors.

**Results:** Across 21 cam deformity samples assessed, a total of 16,259 points were counted. The tissue within the cam deformity was observed to be heterogeneous between specimens, comprised of 16 distinct structures spanning different states of viability. In samples with articular cartilage, the tissue was highly disrupted and/or calcified. The presence of fibrocartilage, necrotic cartilage, and vasculature had significant low-moderate correlations with  $\alpha$  angle. During assessment of capsular tissue quality, synovitis was observed in most samples.

**Conclusion:** The cam deformity is complex and heterogeneous, both within individual cam deformities and between individuals with FAIS. Several cam deformity tissue features were correlated with  $\alpha$  angle, age, sex, and BMI. The heterogeneity observed in these samples indicates that tissue properties within the cam deformity varies between patients with FAIS, which may contribute to outcomes of hip arthroscopic surgery and a patient's level of risk for the subsequent development of osteoarthritis. Our findings suggest distinct tissue phenotypes of FAIS exist, which may be an important consideration for FAIS treatment strategies.

**Key Terms:** FAIS, Sports Medicine, Cam deformity, Tissue Biology

## 1 **INTRODUCTION:**

2 Femoroacetabular impingement syndrome (FAIS) is a hip disorder that is especially  
3 common in active individuals and high-performance athletes, with a reported prevalence of up to  
4 89%<sup>1,2</sup>. A common cause of FAIS is cam morphology, characterized as a 'bony' growth that  
5 causes an asphericity of the femoral head<sup>3</sup>, leading to a lack of femoral head-neck offset. Cam  
6 morphology is widely considered a pre-arthritis condition, acting as a precursor for hip  
7 osteoarthritis (OA)<sup>3-7</sup>. The positive predictive value of developing hip OA within 5 years is  
8 estimated to be 10.9 and 25% in patients diagnosed with moderate and severe cam  
9 morphology, respectively<sup>3</sup>.

10 Since the formal conceptualization of FAIS as a distinctive disease by Ganz et al.<sup>5</sup>, most  
11 studies have been clinically-focused, with an emphasis on advancing surgical techniques to  
12 improve clinical outcomes<sup>8-10</sup>. Hip arthroscopic surgery is the primary treatment for FAIS to  
13 reduce pain and restore function<sup>11-13</sup> with excellent short to midterm patient-reported  
14 outcomes<sup>10,11</sup>. However, despite these promising outcomes, multiple factors have been reported  
15 to be predictive of poor outcomes including older age, female sex, higher body mass index  
16 (BMI), and larger size of cam deformity<sup>10,14</sup>. Open and arthroscopic surgical techniques for FAIS  
17 were designed based on the sole premise that removing the cam deformity would improve hip  
18 biomechanics. However, it remains unknown if the underlying tissue pathology associated with  
19 FAIS is resolved by elimination of the mechanical impingement and/or related to the subsequent  
20 development of hip OA. Thus, studying the tissue properties associated with FAIS can provide  
21 crucial insight to guide future targeted treatments.

22 While studies have reported on articular cartilage presentation with FAIS<sup>15-17</sup>, studies to  
23 robustly or quantitatively investigate the tissue-level structures and viability of the cam deformity  
24 are limited. Recently, Youngman et al.<sup>18</sup> reported the detection of non-osseous and soft tissues  
25 at the cam deformity using magnetic resonance imaging (MRI), demonstrating that  
26 heterogeneities may exist at the tissue-level between different cam deformities. It remains  
27 unknown whether tissue-level heterogeneity can be attributed to disease severity, OA  
28 progression, or other factors. This uncertainty presents a barrier to understanding multiple  
29 aspects of FAIS, including disease progression, and may be a potential contributing factor  
30 towards unfavorable surgical outcomes in certain individuals. Thus, investigations into the  
31 relationship between the tissue properties versus disease severity and patient factors may aid in  
32 further understanding the progression of FAIS disease and identifying potential features that  
33 may be predictive of subsequent OA development.

34 Another tissue system that contributes to inflammation and pain in musculoskeletal  
35 conditions, such as OA, is the surrounding capsule tissue<sup>19,20</sup>. While studies<sup>21,22</sup> have assessed  
36 joint-level metrics of capsule morphology, such as MRI-derived dimensions, thickness and  
37 volume in the context of FAIS, there is limited research on capsular tissue morphology.  
38 Considering the capsule has been implicated as a source of local inflammation of the joint in  
39 OA<sup>19,20</sup>, assessing the extent of the capsular damage or inflammation may also provide insight  
40 into the progression of FAIS into OA.

41 Here, we investigated the cellular and tissue environment within cam deformity and  
42 capsule tissues from cam FAIS patients undergoing hip arthroscopy. Point counting was  
43 performed to spatially characterize the specimens based on tissue type and quality, allowing for  
44 quantitative and statistical assessment. The aims of this study were to: 1) Evaluate  
45 histopathological features in surgically-retrieved cam deformity and capsular tissues, from  
46 patients undergoing hip arthroscopy for cam-type FAIS, 2) Assess the extent of local  
47 inflammation within the joint capsule, and 3) Determine the relationship between the  
48 histopathological tissue composition of the cam deformity versus  $\alpha$  angle and patient  
49 demographics.

## 50 **METHODS:**

### 51 ***Subjects and Institutional Approval***

52 An institutional review board protocol with an associated HIPAA waiver of consent was  
53 approved for this study. Only tissue that would be otherwise discarded during the normal course  
54 of surgery was procured. The duration of this study was one year, and a total number of N=23  
55 samples were collected. Two samples were excluded due to a lack of sample volume, leading to  
56 artifacts during histological preparation.

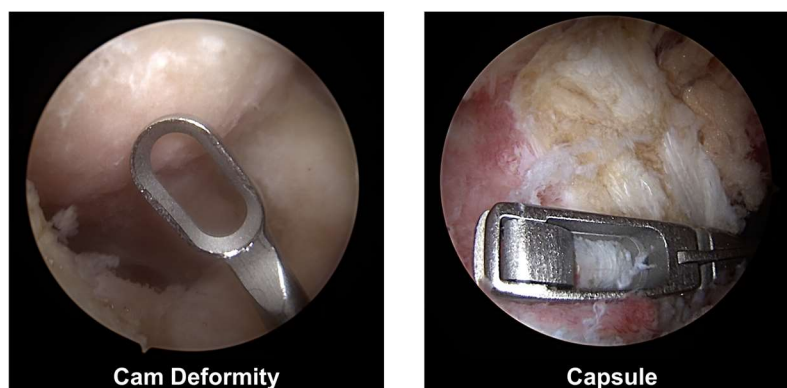

58 *Figure 1: Arthroscopic images indicating areas where specimens were procured. From each subject, specimens were*  
59 *obtained from the apex of the cam lesion and the capsule.*

## 60 ***Surgical procurement***

61 Inclusion criteria included the following: 1) patients >18 years of age, 2) clinical diagnosis  
62 of FAIS, 3) electing to undergo hip arthroscopy. Exclusion criteria included prior diagnosis of  
63 avascular necrosis, dysplasia, and previous history of hip surgery. Patients diagnosed with FAIS  
64 undergoing primary hip arthroscopy with a fellowship-trained sports medicine surgeon at a  
65 single institution were included. Diagnosis of FAIS was made based on reports of hip pain and  
66 symptoms, positive clinical exam findings and radiographic evidence of cam morphology. Alpha  
67 angles were measured using Dunn 45° hip x-ray views, by drawing a circle on the femoral head  
68 and measuring the angle between the line from the center of the femoral head to the midpoint of  
69 the femoral neck and another line from the center of the femoral head to the point of  
70 discontinuity in the circle.

71 Tissue samples were collected from the apex of the cam deformity and capsule of each  
72 subject. The operative joint was accessed via a standard anterolateral portal (ALP) under  
73 fluoroscopic guidance (Figure 1). A second modified mid-anterior portal (mMAP) was  
74 established. While visualizing the cam deformity arthroscopically from the ALP, an arthroscopic  
75 curette was passed through the mMAP and used to harvest cam deformity tissue prior to  
76 resection. Capsular tissue was collected using an arthroscopic punch scissor. Samples were  
77 immediately stored in 10% formalin.

## 78 ***Histological preparation and assessment***

79 All samples were processed for paraffin-embedding. For cam deformity samples,  
80 decalcification was performed due to the presence of bone. Samples were sectioned (6- $\mu$ m) and  
81 stained with hematoxylin and eosin. Light microscopy (Eclipse 89i, Nikon, Melville, NY) was  
82 used to assess tissue morphology. Polarized microscopy (i.e., birefringence) was performed to  
83 assess the presence of fibrillar structures and to discern tissues that have characteristic  
84 birefringent signals, such as bone and fibrocartilage. Two experienced reviewers assessed the  
85 images together, using a consensus-based method. Discrepancies between the reviewers were  
86 discussed until consensus was made on the tissue classification.

87 Point counting was performed on cam deformity samples. A grid of lines 25  $\mu$ m apart  
88 was overlaid on each sample (Figure 2). At each intersection, samples were carefully  
89 assessed for tissue structures and viability, the latter of which was defined by two criteria:  
90 exhibiting nucleated cells and exhibiting characteristic extracellular matrix structure with no  
91 disruption. A spatially-based percentage of the total specimen for each feature was then  
92 calculated. Across the 21 samples assessed, a total of 16,259 points were counted. Point

93 counting was not implemented for the capsule, as they did not exhibit the tissue heterogeneity  
94 seen in the cam deformity. Instead, for capsular samples, a binary assessment was performed  
95 where each feature was marked 'present' or 'not present'. For the capsule, tissue quality was  
96 assessed based on the presence and quality of the synovial lining, the orientation of the  
97 collagen fibrillar network based on birefringence signal, vascularity, cellular activity, and  
98 secondary features (bone fragments, inflammation, etc.).

## 99 **Statistical Analysis**

100 Pearson's correlation coefficients were calculated for each feature observed during point  
101 counting of the cam deformity samples to determine if the spatially-based percentage of each  
102 tissue feature was correlated to  $\alpha$  angle, age, sex, and BMI. 95% confidence intervals were  
103 estimated with bootstrapping (random resampling with replacement) to improve overall  
104 statistical power and accuracy of our statistical estimates<sup>23,24</sup>. If the 95% confidence interval did  
105 not include 0, we rejected the null hypothesis that there is no correlation.

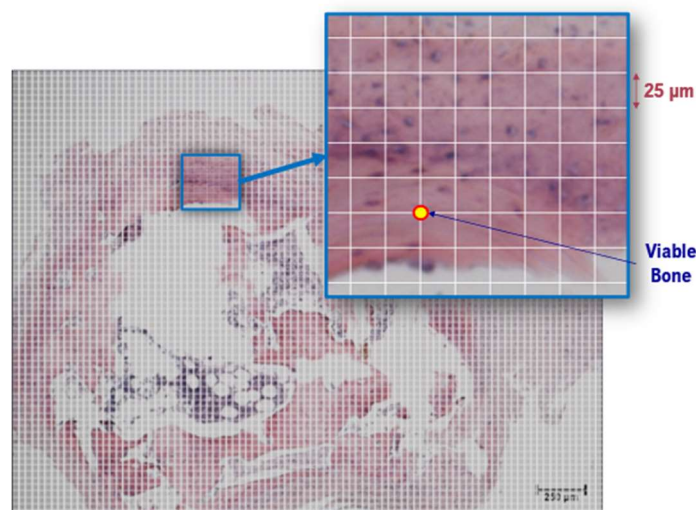

106  
107 *Figure 2: Representative image with point counting grid overlaid. A grid of lines, 25  $\mu$ m apart, was defined, and the*  
108 *feature at each intersection was recorded.*

## 109 **RESULTS**

### 110 ***Cam Deformity Histopathological Features***

111 Large variations of tissue structures and viability status were observed across the cam  
112 deformity samples (Figure 3). We identified 16 unique tissue features, across 8 different tissue  
113 types (Figure 4). As expected, bone was a prominent feature across most samples, although its  
114 state varied widely from viable, detritus, or necrotic. Interestingly, some samples exhibited  
115 minimal bone relative to the entire sample. Although the presence of cartilage was not as

116 abundant compared to bone, several cartilage types were identified within the cam deformity,  
117 including hyaline cartilage, fibrocartilage, and calcified cartilage. In cam deformity samples that  
118 presented with cartilage, the cartilage appeared 'abnormal' (highly disrupted, fibrotic, or  
119 necrotic).

120 Connective tissues were identified as the second most observed tissue feature in the  
121 cam deformity, with a 95.2% observation rate across all samples and a 19.72% observation rate  
122 based on points counted in the cam deformity (Figure 4). To properly describe these connective  
123 tissue structures, qualifiers were used to describe the density of the tissue network  
124 (loose/dense) and the presence of fibers (birefringence). Most samples exhibited loose  
125 connective tissue, with very few samples exhibiting dense connective tissues.

126 While muscle was present in 90.5% of specimens, only 7.8% of points counted were  
127 comprised of muscle, indicating that this was likely an artifact of port placement during  
128 arthroscopy.

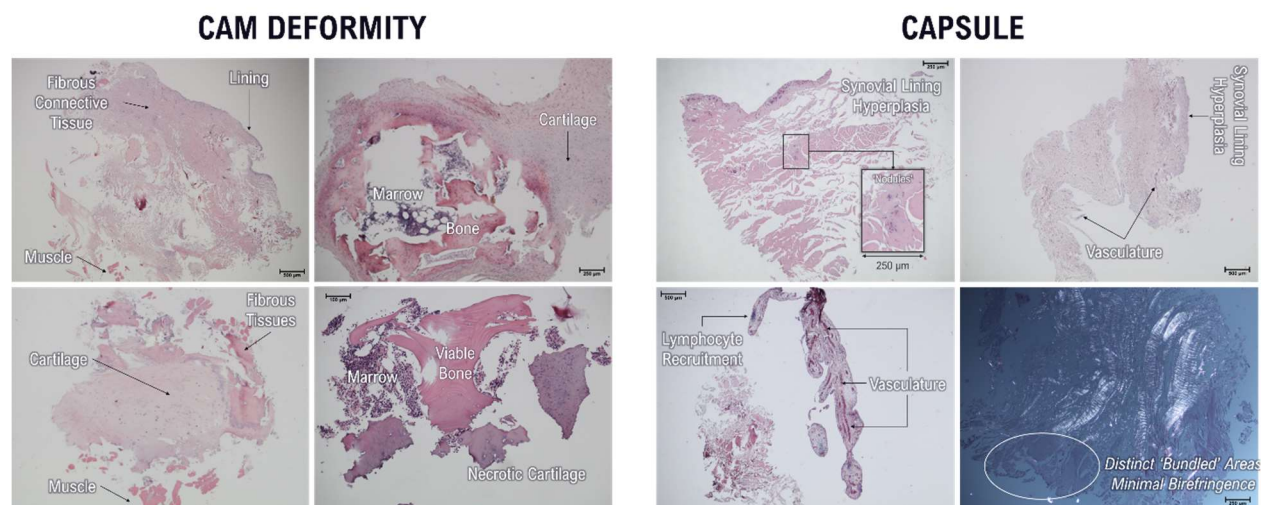

129  
130 *Figure 3: Left: Representative images of cam deformity specimens. Variations in tissue features can be seen across*  
131 *different specimens. Right: Representative synovium/capsular images from different patients.*

132

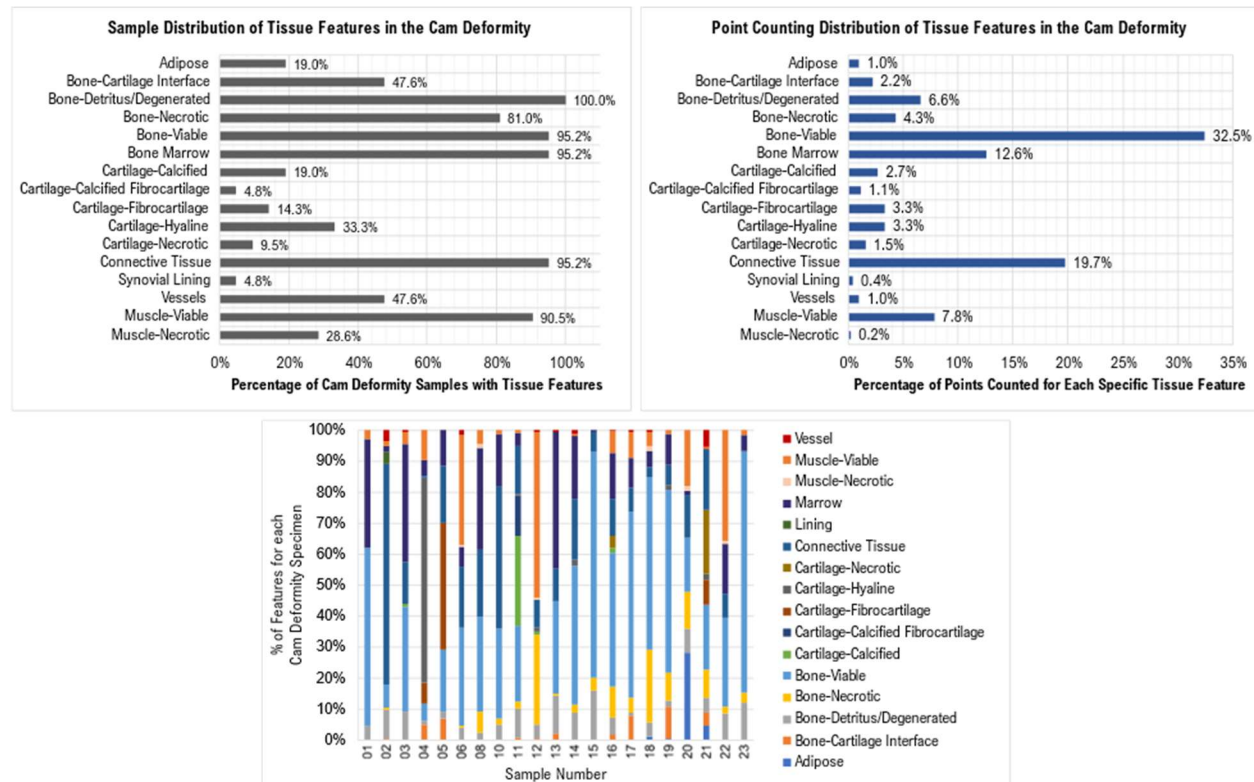

133

134 *Figure 4: Overall distribution of tissue features in the cam deformity, determined from the binary assessment of*  
 135 *whether tissue features were present or not. Top Left – Distribution based on the number of samples exhibiting each*  
 136 *tissue feature. Top Right – Distribution based on the number of points counted exhibiting each tissue feature. Bottom*  
 137 *– The percentage for each tissue feature shown within each specimen (represented by each bar).*

138

### 139 **Capsule Histopathological Features and Local Inflammation**

140 Capsular tissues were found to be more consistent in quality across samples, sharply  
 141 contrasting our findings for the cam deformity. Interestingly, the joint capsule samples exhibited  
 142 minimal cellular activity that would indicate chronic local inflammation – 2 out of 21 samples  
 143 exhibited an inflammatory response, characterized by hypercellularity and the presence of  
 144 specific immune cells, such as lymphocytes or plasma cells. While inflammatory cells were not  
 145 abundantly observed across the capsule specimens, if at all, several abnormal features in the  
 146 capsule were identified (Table 1). Out of 21 samples, 7 presented with hyperplasia and/or  
 147 thickening of the synovial lining, often with hypervascularity, indicating potential synovitis. Other  
 148 ‘abnormal’ features observed included the presence of ‘nodule-like’ tissue features (Figure 3).  
 149 While these features closely resembled the structure of blood vessels, these were often closed  
 150 with no indication of nearby red blood cells. Because of this lack of certainty, these features  
 151 were designated to a separate tissue category. Another ‘abnormal feature’ identified in many  
 152 samples were tissue structures that appeared ‘bundle-like’ that expressed minimal to no



153 birefringence, appearing in 11 samples. In these areas, a clear demarcation of structures was  
 154 present, both visible under bright light and polarized light. In addition, similar ‘bundled’ tissue  
 155 structures with birefringence were also observed in 7 samples.

156 **Relationships Between Cam Deformity Tissue Features Versus Disease Severity and**  
 157 **Patient Factors**

158 Out of 16 unique tissue features observed in the cam deformity, the spatial percentages  
 159 of fibrocartilage, necrotic cartilage, and vasculature were shown to have significant moderate  
 160 positive correlations with  $\alpha$  angle (Table 2). In terms of demographic and anthropometric factors,  
 161 several tissue features were found to be significantly correlated to these factors (Table 2). Age  
 162 was found to be negatively correlated to the percentage of detritus or degenerated bone, and  
 163 positively correlated to the percentage of hyaline cartilage. Necrotic bone and viable muscle  
 164 were both found to be moderately correlated to male sex (negative correlation). Fibrocartilage,  
 165 connective tissue, and bone marrow presence were found to have low to moderate correlations  
 166 to female sex (positive correlation). Finally, BMI was found to be negatively correlated with the  
 167 percentage of hyaline cartilage and vasculature.

168 *Table 1: Overview of various tissue features and markers of quality in the capsule tissue for each specimen.*

| Sample | Lining    | Cellularity | Vascularity            | Bone Fragments | Bundles (Birefringence) | Bundles (No Birefringence) | Inflammation | Fascia/Adipose | Nodule |
|--------|-----------|-------------|------------------------|----------------|-------------------------|----------------------------|--------------|----------------|--------|
| 1      | No Lining | Normal      | Normal                 | X              |                         |                            |              |                |        |
| 2      | Hyper     | Normal      | Hypervascularity       |                | X                       |                            |              |                |        |
| 3      | No Lining | Normal      | Normal                 | X              |                         | X                          |              |                |        |
| 4      | No Lining | Normal      | No Vessels             |                |                         | X                          |              |                |        |
| 5      | Hyper     | Hyper       | Hypervascularity       |                |                         |                            | X            |                |        |
| 6      | No Lining | Normal      | Thickened vessel walls |                |                         | X                          |              | X              |        |
| 8      | No Lining | Hypo        | Large Vessels          |                |                         | X                          |              | X              |        |
| 10     | Hyper     | Hyper       | Hypervascularity       | X              | X                       |                            | X            |                | X      |
| 11     | Hyper     | Normal      | Hypervascularity       | X              | X                       |                            |              |                | X      |
| 12     | No Lining | Normal      | Normal                 | X              |                         | X                          |              |                | X      |
| 13     | Hyper     | Normal      | Hypervascularity       |                |                         | X                          |              |                | X      |
| 14     | No Lining | Normal      | No Vessels             | X              |                         |                            |              |                |        |
| 15     | No Lining | Normal      | No Vessels             | X              |                         |                            |              | X              |        |
| 16     | Hyper     | Normal      | Normal                 |                |                         | X                          |              |                |        |
| 17     | No Lining | Normal      | Normal                 | X              | X                       | X                          |              |                | X      |
| 18     | Hyper     | Normal      | No Vessels             |                | X                       |                            |              |                | X      |
| 19     | No Lining | Normal      | Normal                 | X              | X                       | X                          |              |                |        |
| 20     | Normal    | Normal      | Normal                 | X              | X                       | X                          |              |                |        |
| 21     | No Lining | Normal      | Normal                 |                |                         | X                          |              |                |        |
| 22     | No Lining | Normal      | Normal                 |                |                         |                            |              |                |        |
| 23     | Normal    | Normal      | Normal                 |                |                         |                            |              |                |        |

169 *Table 2: Pearson’s correlation coefficients with 95% confidence intervals estimated by bootstrapping for tissue*  
 170 *features found to be correlated with disease severity, age, biological sex, and BMI.*

| <b><math>\alpha</math> angle</b> | <b>R</b> | <b>Low CI</b> | <b>High CI</b> |
|----------------------------------|----------|---------------|----------------|
| Fibrocartilage                   | 0.3812   | 0.1077        | 0.9545         |
| Necrotic Cartilage               | 0.3374   | 0.0266        | 0.9106         |
| Vasculature                      | 0.4274   | 0.1303        | 1.0387         |
| <b>Age</b>                       |          |               |                |
| Detritus/Degenerated Bone        | -0.4823  | -0.9065       | -0.2070        |
| Hyaline Cartilage                | 0.3294   | 0.0135        | 0.8438         |
| <b>Biological Sex (-M, +F)</b>   |          |               |                |
| Necrotic Bone                    | -0.5006  | -1.0484       | -0.1805        |
| Fibrocartilage                   | 0.1904   | 0.0062        | 0.2739         |
| Connective Tissue                | 0.2655   | 0.0175        | 0.5457         |
| Marrow                           | 0.3096   | 0.0580        | 0.5838         |
| Viable Muscle                    | -0.4144  | -0.9242       | -0.0574        |
| <b>BMI</b>                       |          |               |                |
| Hyaline Cartilage                | -0.2604  | -0.8533       | -0.0156        |
| Vasculature                      | -0.2232  | -0.5177       | -0.0095        |

171

## 172 **DISCUSSION**

173 This study demonstrates that the cam deformity is comprised of a heterogeneous  
174 mixture of tissue types, including bone, cartilage, and fibrous tissues. The state of viability of  
175 these tissues also varied widely between subjects, with viable tissue, detritus tissue, and  
176 necrotic tissue observed across the samples. Only minimal inflammation was observed in  
177 respective capsular specimens. Additionally, certain features were found to be significantly  
178 correlated to  $\alpha$  angle and various patient demographics. We also qualitatively observed  
179 differences in tissue structure distribution between patient samples, which may indicate that  
180 cam-type FAIS may present as different tissue phenotypes of disease, as opposed to a singular  
181 disease characterized simply by an osseous overgrowth. The notion of cam-type FAIS  
182 phenotypes has also been previously suggested in other literature<sup>15,23,24</sup>, and our results  
183 strongly support this paradigm.

184 To our knowledge, this is the first study to quantitatively assess the tissue features within  
185 the cam deformity from FAIS patients. While there are previous studies assessing the cam  
186 deformity and surrounding tissues, most studies have relied on cadavers, or have implemented  
187 histological grading scales<sup>15,17,25,26</sup> of cartilage degradation that were specifically developed to  
188 describe OA progression. While these previous studies have offered crucial insight into tissue  
189 structures associated with FAIS, the tissue quality is often qualitatively described, limiting the  
190 ability to assess relationships between tissue expression and other factors. Here, we  
191 implemented point counting to determine a spatial percentage for each tissue feature, providing  
192 a robust quantification of presence of certain features in the cam deformity and a statistical  
193 assessment of the relationships between tissue features and  $\alpha$  angle.

194 We identified 16 distinct features across 8 distinct tissue types within the cam deformity.  
195 Of these features, 3 were correlated with increasing  $\alpha$ -angle: fibrocartilage, necrotic cartilage,  
196 and vasculature. These tissue features have all been reported to be associated with tissue  
197 injury and repair<sup>27,28</sup>. Given that FAIS induces a repetitive injury at the proximal femur, these  
198 potential relationships between cam deformity size ( $\alpha$  angle) and tissue markers associated with  
199 injury are probable. Future work is necessary to determine if there is a mechanistic link between  
200 these factors and cam deformity tissue presentation and will include assessing injury markers  
201 using targeted techniques like immunohistochemistry and spatial transcriptomics. In addition,  
202 while capsular specimens exhibited minimal to no local inflammation, the presence of both  
203 hyperplasia and hypervascularity is suggestive of synovitis, which has been shown to be  
204 associated with pain<sup>29</sup>. Features that were uncharacteristic or abnormal, such as closed  
205 nodules of concentric cells or bundle-like tissues, were also identified. For the latter, it may be of  
206 interest to determine whether differences in fiber density of these bundle-like tissue structures  
207 are related to the tissue's structural integrity. Future work is also necessary to determine what  
208 the nodule and bundle-like features represent and how they are related to capsule  
209 health/pathology.

210 In addition to disease severity, age, sex, and BMI were assessed. Given that FAIS  
211 typically occurs in younger individuals, it is reasonable to speculate that mechanisms associated  
212 with skeletal maturity may contribute to the tissue distribution observed in the cam deformity.  
213 This would correspond to our finding that age was negatively correlated with detritus bone,  
214 which may be due to increases in mature bone in older individuals. Interestingly, we did not  
215 observe the same correlations between age and viable bone- only detritus bone was found to  
216 be correlated with age. This suggests that skeletal maturity may not be the sole contributing  
217 factor to the tissue features observed, and that other factors, such as type of sports/daily  
218 activity, joint biomechanics, and anatomical variations may also be involved. In addition, hyaline  
219 cartilage was shown to have a positive correlation with age. This was contradictory to what we  
220 expected, since hyaline cartilage tends to be more abundant in younger developing individuals  
221 who are not yet skeletally mature. One possible explanation as to why hyaline cartilage was  
222 found to increase with age may be related to the changes in architecture associated with  
223 cartilage maturation. Compared to immature cartilage, mature cartilage has a hierarchal  
224 architecture that contributes to an increased mechanical stiffness and increased stability of the  
225 extracellular matrix network<sup>30</sup>. These characteristics are known to play roles in the tissue's  
226 capacity to bear load<sup>31-33</sup>. This may have implications on how the tissue responds to abnormal  
227 loading incurred by repetitive joint injury, as occurs in FAIS. While this speculation may be

228 reasonable, it is crucial to note that only a low-moderate correlation was identified for hyaline  
229 cartilage versus age, and that further investigation is necessary to better understand and  
230 confirm the relationship between hyaline cartilage and age in FAIS. In addition to age,  
231 correlations between tissue features and biological sex were also assessed. It is also important  
232 to consider the sex-based differences in the rates of skeletal maturity, which may imply that  
233 these factors may interact with each other to affect the tissue environment.

### 234 ***Limitations***

235 In this study, only representative samples of the cam deformity and capsule were  
236 retrieved, which may not capture all features that are present. These data were also collected  
237 without context of the patient's clinical presentation. To mitigate this limitation, we strived to  
238 obtain samples at the highest point of the cam deformity, to improve consistency between  
239 procurements. Despite this, our findings provide a robust quantitative evaluation of tissue  
240 features in patients with cam-type FAIS, serving as a major step towards understanding the  
241 tissue environment associated with FAIS.

242 Another potential limitation of the presented study is the lack of a control group for  
243 comparison. However, it is crucial to note that in this study, it would be unethical to remove  
244 healthy normal tissue from either a patient with FAI or a healthy individual, as this may incur  
245 harm on human subject. While one could argue that cadavers may be used as a "control"  
246 specimen, we chose not to use cadaveric specimens, as they are often fresh frozen, which can  
247 cause artifacts in histological preparation. Therefore, a one-to-one comparison between  
248 surgically retrieved pathological samples and cadaveric samples would not be a reasonable  
249 comparison. Therefore, the purpose of this study was not to compare FAI vs. healthy groups,  
250 but to comprehensively assess the overall variability of tissue structures in the cam deformity, to  
251 better understand how consistent the cam deformity's tissue structure is in the context of FAI.

### 252 **CONCLUSION**

253 The cam deformity is complex and heterogeneous, both within individual cam deformities  
254 and between individuals with FAIS. Several cam deformity tissue features were correlated with  $\alpha$   
255 angle, age, sex, and BMI. The heterogeneity observed in these samples indicates that tissue  
256 properties within the cam deformity varies between patients with FAIS, which may contribute to  
257 outcomes of hip arthroscopic surgery and a patient's level of risk for the subsequent development  
258 of osteoarthritis.

## **REFERENCES**

1. Siebenrock KA, Ferner F, Noble PC, et al. The Cam-type Deformity of the Proximal Femur Arises in Childhood in Response to Vigorous Sporting Activity. *Clinical Orthopaedics & Related Research* 2011; 469: 3229–3240.
2. Agricola R, Waarsing JH, Arden NK, et al. Cam impingement of the hip—a risk factor for hip osteoarthritis. *Nat Rev Rheumatol* 2013; 9: 630–634.
3. Agricola R, Heijboer MP, Bierma-Zeinstra SMA, et al. Cam impingement causes osteoarthritis of the hip: a nationwide prospective cohort study (CHECK). *Annals of the Rheumatic Diseases* 2013; 72: 918–923.
4. Van-Klij P, Heerey J, Waarsing JH, et al. The Prevalence of Cam and Pincer Morphology and Its Association With Development of Hip Osteoarthritis. *J Orthop Sports Phys Ther* 2018; 48: 230–238.
5. Ganz R, Parvizi J, Beck M, et al. Femoroacetabular impingement: a cause for osteoarthritis of the hip. *Clin Orthop Relat Res* 2003; 112–120.
6. Harris W. Etiology of osteoarthritis of the hip. *Clinical orthopaedics and related research*. Epub ahead of print 1986. DOI: 10.1097/00003086-198612000-00004.
7. Gosvig KK, Jacobsen S, Sonne-Holm S, et al. Prevalence of malformations of the hip joint and their relationship to sex, groin pain, and risk of osteoarthritis: a population-based survey. *J Bone Joint Surg Am* 2010; 92: 1162–1169.
8. Nho SJ, Magennis EM, Singh CK, et al. Outcomes after the Arthroscopic Treatment of Femoroacetabular Impingement in a Mixed Group of High-Level Athletes. *Am J Sports Med* 2011; 39: 14–19.
9. Kunze KN, Krivicich LM, Clapp IM, et al. Machine Learning Algorithms Predict Achievement of Clinically Significant Outcomes After Orthopaedic Surgery: A Systematic Review. *Arthroscopy* 2022; 38: 2090–2105.
10. Minkara AA, Westermann RW, Rosneck J, et al. Systematic Review and Meta-analysis of Outcomes After Hip Arthroscopy in Femoroacetabular Impingement. *Am J Sports Med* 2019; 47: 488–500.
11. Kyin C, Maldonado DR, Go CC, et al. Mid- to Long-Term Outcomes of Hip Arthroscopy: A Systematic Review. *Arthroscopy: The Journal of Arthroscopic & Related Surgery* 2021; 37: 1011–1025.
12. Minkara AA, Westermann RW, Rosneck J, et al. Systematic Review and Meta-analysis of Outcomes After Hip Arthroscopy in Femoroacetabular Impingement. *Am J Sports Med* 2019; 47: 488–500.
13. Samaan MA, Grace T, Zhang AL, et al. Short term outcomes of hip arthroscopy on hip joint mechanics and cartilage health in patients with femoroacetabular impingement syndrome. *Clinical Biomechanics* 2020; 71: 214–220.

14. Sogbein OA, Shah A, Kay J, et al. Predictors of Outcomes After Hip Arthroscopic Surgery for Femoroacetabular Impingement: A Systematic Review. *Orthop J Sports Med* 2019; 7: 2325967119848982.
15. Haneda M, Rai MF, Cai L, et al. Distinct Pattern of Inflammation of Articular Cartilage and the Synovium in Early and Late Hip Femoroacetabular Impingement: *The American Journal of Sports Medicine*. Epub ahead of print 31 July 2020. DOI: 10.1177/0363546520935440.
16. Hashimoto S, Rai MF, Gill CS, et al. Molecular characterization of articular cartilage from young adults with femoroacetabular impingement. *J Bone Joint Surg Am* 2013; 95: 1457–1464.
17. Kohl S, Hosalkar HS, Mainil-Varlet P, et al. Histology of damaged acetabular cartilage in symptomatic femoroacetabular impingement: an observational analysis. *Hip Int* 2011; 21: 154–162.
18. Youngman TR, Johnson BL, Morris WZ, et al. Soft Tissue Cam Impingement in Adolescents: MRI Reveals Impingement Lesions Underappreciated on Radiographs. *Am J Sports Med* 2023; 51: 3749–3755.
19. Scanzello CR, Goldring SR. The role of synovitis in osteoarthritis pathogenesis. *Bone* 2012; 51: 249–257.
20. Sowers M, Karvonen-Gutierrez CA, Jacobson JA, et al. Associations of anatomical measures from MRI with radiographically defined knee osteoarthritis score, pain, and physical functioning. *J Bone Joint Surg Am* 2011; 93: 241–251.
21. Weidner J, Büchler L, Beck M. Hip Capsule Dimensions in Patients With Femoroacetabular Impingement: A Pilot Study. *Clinical orthopaedics and related research*; 470. Epub ahead of print 19 July 2012. DOI: 10.1007/s11999-012-2485-2.
22. Nguyen KH, Shaw C, Link TM, et al. Changes in Hip Capsule Morphology after Arthroscopic Treatment for Femoroacetabular Impingement Syndrome with Periportal Capsulotomy are Correlated With Improvements in Patient-Reported Outcomes. *Arthroscopy: The Journal of Arthroscopic & Related Surgery* 2022; 38: 394–403.
23. Seth A, Yen Y-M, Tourn D, et al. A Unique and Characteristic Cam FAI Morphology in Young Patients with Comorbid Inflammatory Conditions. *J Bone Joint Surg Am* 2020; 102: 15–21.
24. Ng KCG, Lamontagne M, Adamczyk AP, et al. Patient-Specific Anatomical and Functional Parameters Provide New Insights into the Pathomechanism of Cam FAI. *Clin Orthop Relat Res* 2015; 473: 1289–1296.
25. Abraham CL, Bangerter NK, McGavin LS, et al. Accuracy of 3D dual echo steady state (DESS) MR arthrography to quantify acetabular cartilage thickness. *J Magn Reson Imaging* 2015; 42: 1329–1338.

26. Haider I, Speirs A, Alnabelseya A, et al. Femoral subchondral bone properties of patients with cam-type femoroacetabular impingement. *Osteoarthritis and Cartilage* 2016; 24: 1000–1006.
27. Armiento AR, Alini M, Stoddart MJ. Articular fibrocartilage - Why does hyaline cartilage fail to repair? *Advanced Drug Delivery Reviews* 2019; 146: 289–305.
28. Chen C-T, Burton-Wurster N, Borden C, et al. Chondrocyte necrosis and apoptosis in impact damaged articular cartilage. *Journal of Orthopaedic Research* 2001; 19: 703–711.
29. Scanzello CR, Albert AS, DiCarlo E, et al. The influence of synovial inflammation and hyperplasia on symptomatic outcomes up to two-years post-operatively in patients undergoing partial meniscectomy. *Osteoarthritis Cartilage* 2013; 21: 1392–1399.
30. Hunziker EB, Kapfinger E, Geiss J. The structural architecture of adult mammalian articular cartilage evolves by a synchronized process of tissue resorption and neoformation during postnatal development. *Osteoarthritis and Cartilage* 2007; 15: 403–413.
31. Chahine NO, Wang CC-B, Hung CT, et al. Anisotropic strain-dependent material properties of bovine articular cartilage in the transitional range from tension to compression. *J Biomech* 2004; 37: 1251.
32. Mell SP, Yuh C, Nagel T, et al. Development of a computational-experimental framework for enhanced mechanical characterization and cross-species comparison of the articular cartilage superficial zone. *Computer Methods in Biomechanics and Biomedical Engineering* 2023; 0: 1–5.
33. Yuh C, Laurent MP, Espinosa-Marzal RM, et al. Transient stiffening of cartilage during joint articulation: A microindentation study. *Journal of the Mechanical Behavior of Biomedical Materials* 2021; 113: 104–113.
